# Supplementary material
Source: HighWire-hosted journal article supplement (https://sti.bmj.com/content/97/8/566)
Supplement: inline-supplementary-material-4 [file inline-supplementary-material-4.pdf]

Supplemental Figure 2. Degree of willingness among HIV physicians to offer a novel long-acting HIV regimen to their HIV+ patients

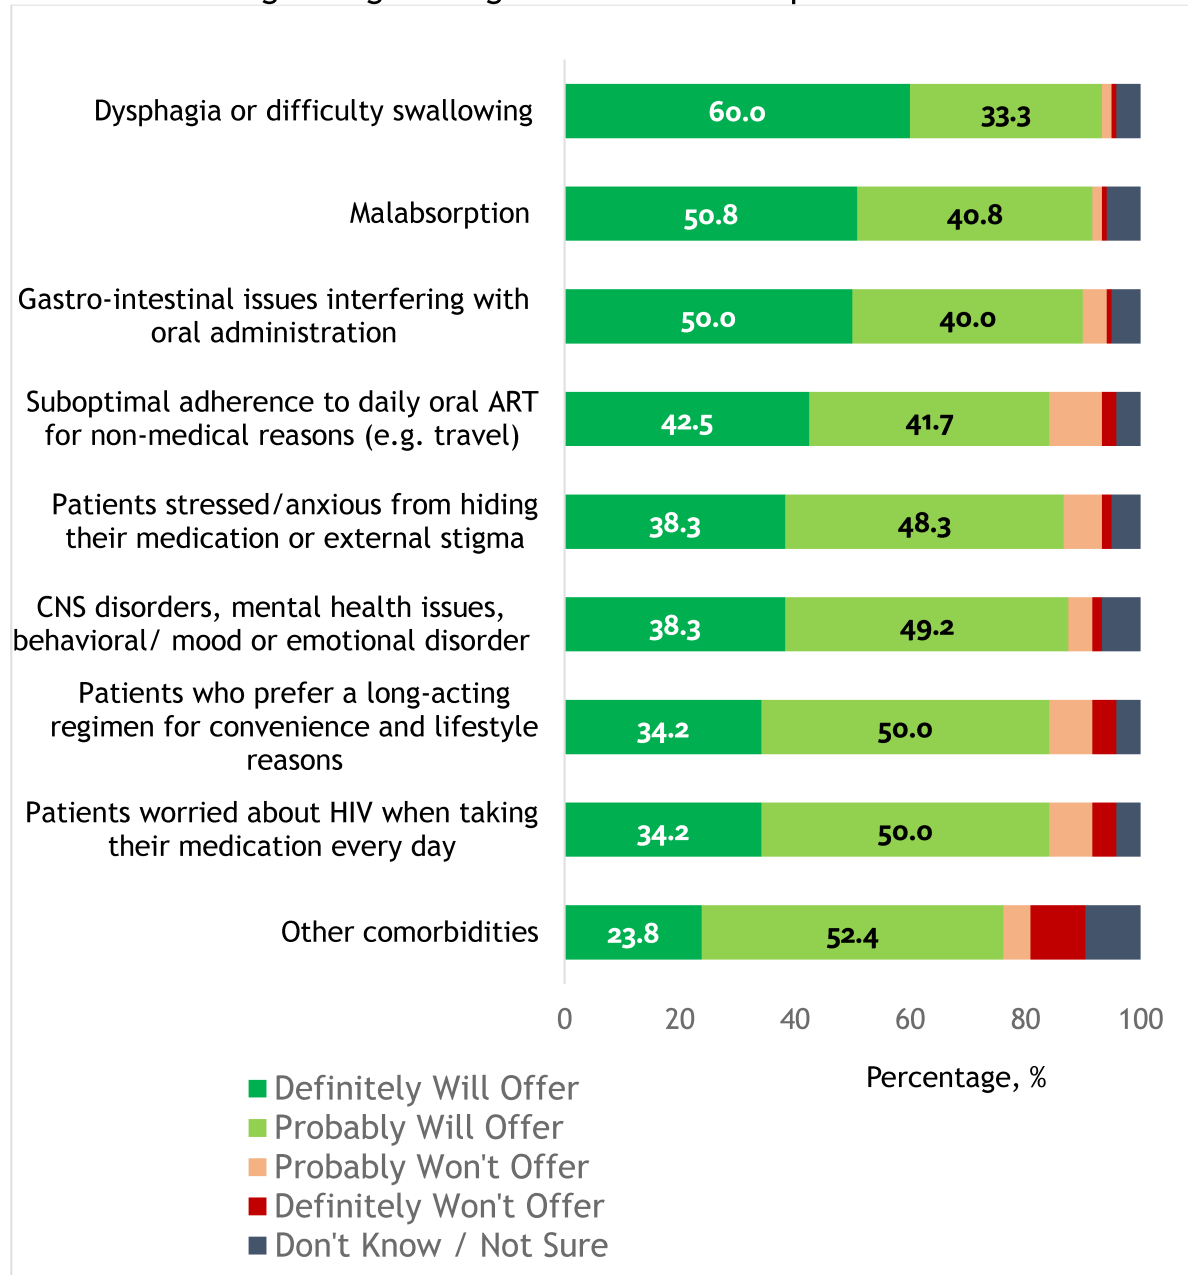

Note: ART = antiretroviral therapy.
